# Supplementary material for: Utilization of Hospital-Level Mental Health Care Services for Inmates in France: A Transversal Study
Source: Atypon-hosted journal article supplement (doi:10.1176/appi.ps.201900497), 2020-04-08

**Supplementary Table.** Principal diagnoses in prisoners admitted for psychiatric care in UHSAs, general psychiatric hospitals, UMDs and SMPRs (France, 2016).

*UHSA: unité hospitalière spécialement aménagée (“specially equipped hospital units”); UMD: unité pour malades difficiles (“units for difficult patients”); SMPR: service médico-psychologique régional (“regional medical-psychological services”).*

| <i>ICD-10-coded principal diagnosis</i>                                                                     | <i>All<br/>(n=4392)</i> |             | <i>UHSAs<br/>(n=1944)</i> |             | <i>General<br/>psychiatric<br/>hospitals<br/>(n=1787)*</i> |             | <i>UMDs<br/>(n=97)</i> |             | <i>SMPRs<br/>(n=1465)</i> |             |
|-------------------------------------------------------------------------------------------------------------|-------------------------|-------------|---------------------------|-------------|------------------------------------------------------------|-------------|------------------------|-------------|---------------------------|-------------|
|                                                                                                             | <i>N</i>                | <i>%</i>    | <i>N</i>                  | <i>%</i>    | <i>N</i>                                                   | <i>%</i>    | <i>N</i>               | <i>%</i>    | <i>N</i>                  | <i>%</i>    |
| <b>F20-29 Schizophrenia, schizotypal and delusional disorders</b>                                           | <b>1373</b>             | <b>31.3</b> | <b>815</b>                | <b>41.9</b> | <b>566</b>                                                 | <b>31.7</b> | <b>73</b>              | <b>75.3</b> | <b>401</b>                | <b>27.4</b> |
| F20 Schizophrenia                                                                                           | 911                     | 20.7        | 547                       | 28.1        | 371                                                        | 20.8        | 56                     | 57.7        | 287                       | 19.6        |
| F21-29 Nonorganic psychotic disorders                                                                       | 462                     | 10.6        | 268                       | 13.8        | 195                                                        | 10.9        | 17                     | 17.5        | 114                       | 7.8         |
| F21 Schizotypal disorder                                                                                    | 27                      | 0.6         | 9                         | 0.5         | 13                                                         | 0.7         | 1                      | 1.0         | 11                        | 0.8         |
| F22 Persistent delusional disorders                                                                         | 117                     | 2.7         | 65                        | 3.3         | 57                                                         | 3.2         | 6                      | 6.2         | 20                        | 1.4         |
| F23 Acute and transient psychotic disorders                                                                 | 139                     | 3.2         | 77                        | 4.0         | 68                                                         | 3.8         | 4                      | 4.1         | 28                        | 1.9         |
| F25 Schizoaffective disorders                                                                               | 86                      | 2.0         | 65                        | 3.3         | 31                                                         | 1.7         | 4                      | 4.1         | 18                        | 1.2         |
| F28 Other nonorganic psychotic disorders                                                                    | 16                      | 0.4         | 5                         | 0.3         | 4                                                          | 0.2         | -                      | -           | 7                         | 0.1         |
| F29 Unspecified nonorganic psychosis                                                                        | 77                      | 1.8         | 47                        | 2.4         | 22                                                         | 1.2         | 2                      | 2.1         | 30                        | 2.1         |
| <b>F30-39 Mood disorders</b>                                                                                | <b>617</b>              | <b>14.1</b> | <b>371</b>                | <b>19.1</b> | <b>277</b>                                                 | <b>15.5</b> | <b>9</b>               | <b>9.3</b>  | <b>146</b>                | <b>10.0</b> |
| F30-31 Bipolar affective disorder                                                                           | 159                     | 3.6         | 104                       | 5.4         | 78                                                         | 4.4         | 4                      | 4.1         | 35                        | 2.4         |
| F32-39 Depressive disorder                                                                                  | 458                     | 10.4        | 267                       | 13.7        | 199                                                        | 11.1        | 5                      | 5.2         | 111                       | 7.6         |
| <b>F40-48 Neurotic, stress-related and somatoform disorders</b>                                             | <b>792</b>              | <b>18.0</b> | <b>378</b>                | <b>19.4</b> | <b>390</b>                                                 | <b>21.8</b> | <b>5</b>               | <b>5.2</b>  | <b>215</b>                | <b>14.7</b> |
| <b>F60-69 Disorders of adult personality and behaviour</b>                                                  | <b>1004</b>             | <b>22.9</b> | <b>494</b>                | <b>25.4</b> | <b>476</b>                                                 | <b>26.6</b> | <b>19</b>              | <b>19.6</b> | <b>318</b>                | <b>21.7</b> |
| <b>F10-19 Mental and behavioural disorders due to psychoactive substance use</b>                            | <b>344</b>              | <b>7.8</b>  | <b>120</b>                | <b>6.2</b>  | <b>130</b>                                                 | <b>7.3</b>  | <b>4</b>               | <b>4.1</b>  | <b>169</b>                | <b>11.6</b> |
| F10 due to use of alcohol                                                                                   | 105                     | 2.4         | 24                        | 1.2         | 43                                                         | 2.4         | 1                      | 1.0         | 62                        | 4.2         |
| F11 due to use of opioids                                                                                   | 74                      | 1.7         | 29                        | 1.5         | 18                                                         | 1.0         | 1                      | 1.0         | 38                        | 2.6         |
| F12 due to use of cannabinoids                                                                              | 69                      | 1.6         | 42                        | 2.2         | 31                                                         | 1.7         | 2                      | 2.1         | 21                        | 1.4         |
| F19 due to multiple drug use and use of other psychoactive substances                                       | 79                      | 1.8         | 24                        | 1.2         | 28                                                         | 1.6         | -                      | -           | 43                        | 2.9         |
| <b>F00-09 Organic (including symptomatic) mental disorders</b>                                              | <b>27</b>               | <b>0.6</b>  | <b>17</b>                 | <b>0.9</b>  | <b>12</b>                                                  | <b>0.7</b>  | <b>-</b>               | <b>-</b>    | <b>4</b>                  | <b>0.3</b>  |
| <b>F70-79 Mental retardation</b>                                                                            | <b>42</b>               | <b>1.0</b>  | <b>20</b>                 | <b>1.0</b>  | <b>15</b>                                                  | <b>0.8</b>  | <b>-</b>               | <b>-</b>    | <b>23</b>                 | <b>1.6</b>  |
| <b>F90-98 Behavioural and emotional disorders with onset usually occurring in childhood and adolescence</b> | <b>34</b>               | <b>0.8</b>  | <b>13</b>                 | <b>0.7</b>  | <b>17</b>                                                  | <b>1.0</b>  | <b>-</b>               | <b>-</b>    | <b>12</b>                 | <b>0.8</b>  |
| F91 Conduct disorders                                                                                       | 14                      | 0.3         | 9                         | 0.5         | 4                                                          | 0.2         | -                      | -           | 5                         | 0.3         |
| <b>F84 Pervasive developmental disorders</b>                                                                | <b>20</b>               | <b>0.5</b>  | <b>7</b>                  | <b>0.4</b>  | <b>11</b>                                                  | <b>0.6</b>  | <b>-</b>               | <b>-</b>    | <b>5</b>                  | <b>0.3</b>  |
| <b>F99 Unspecified mental disorder</b>                                                                      | <b>22</b>               | <b>0.5</b>  | <b>1</b>                  | <b>0.1</b>  | <b>20</b>                                                  | <b>1.1</b>  | <b>4</b>               | <b>4.1</b>  | <b>2</b>                  | <b>0.1</b>  |
| <b>No psychiatric disorder as principal diagnosis</b>                                                       | <b>667</b>              | <b>15.2</b> | <b>131</b>                | <b>6.8</b>  | <b>218</b>                                                 | <b>12.2</b> | <b>3</b>               | <b>3.1</b>  | <b>339</b>                | <b>23.1</b> |

\* excluding UMD units

*Comment:* The principal diagnosis was a psychiatric disorder for most of the patients (n=3725, 85%). Of these patients, 3230 (87%) had only one principal diagnosis. For patients with multiple stays, principal diagnoses diverged, with 2 principal diagnoses for 449 patients and 3 principal diagnoses for 46 patients. The main diverging diagnoses were psychotic disorders (F20-F29), where personality disorders (F60-F69) were diagnosed for 101 patients, anxiety disorders (F40-F48) with personality disorders (F60-F69) for 90 patients, mood disorders (F30-F39) with personality disorders (F60-F69) for 73 patients, mood disorders (F30-F39) with anxiety disorders (F40-F48) for 66 patients and psychotic disorders (F20-F29) with anxiety disorders (F40-F48) for 65 patients. Among patients with no psychiatric diagnosis, 25% (n=167) had no diagnosis noted at all, 33% (n=222) had ICD-10 code Z651 *"Problems related to other psychosocial circumstances (Imprisonment and other incarceration)"*, 22% (n=146) had ICD-10 code Z004 *"General psychiatric examination, not elsewhere classified"*, and 20% (n=132) had another ICD-10 code.

**Supplementary Figure.** Percentage of psychiatric hospitalisations for inmates in *unités hospitalières spécialement aménagées* (UHSA; “specially equipped hospital units”) per French department in 2016.

Percentage for a department= number of psychiatric hospitalisations in UHSAs for inmates / number of full-time psychiatric hospitalisations for inmates.

NA: fewer than 5 hospitalisations from prisons located in the department or no prison located in the department

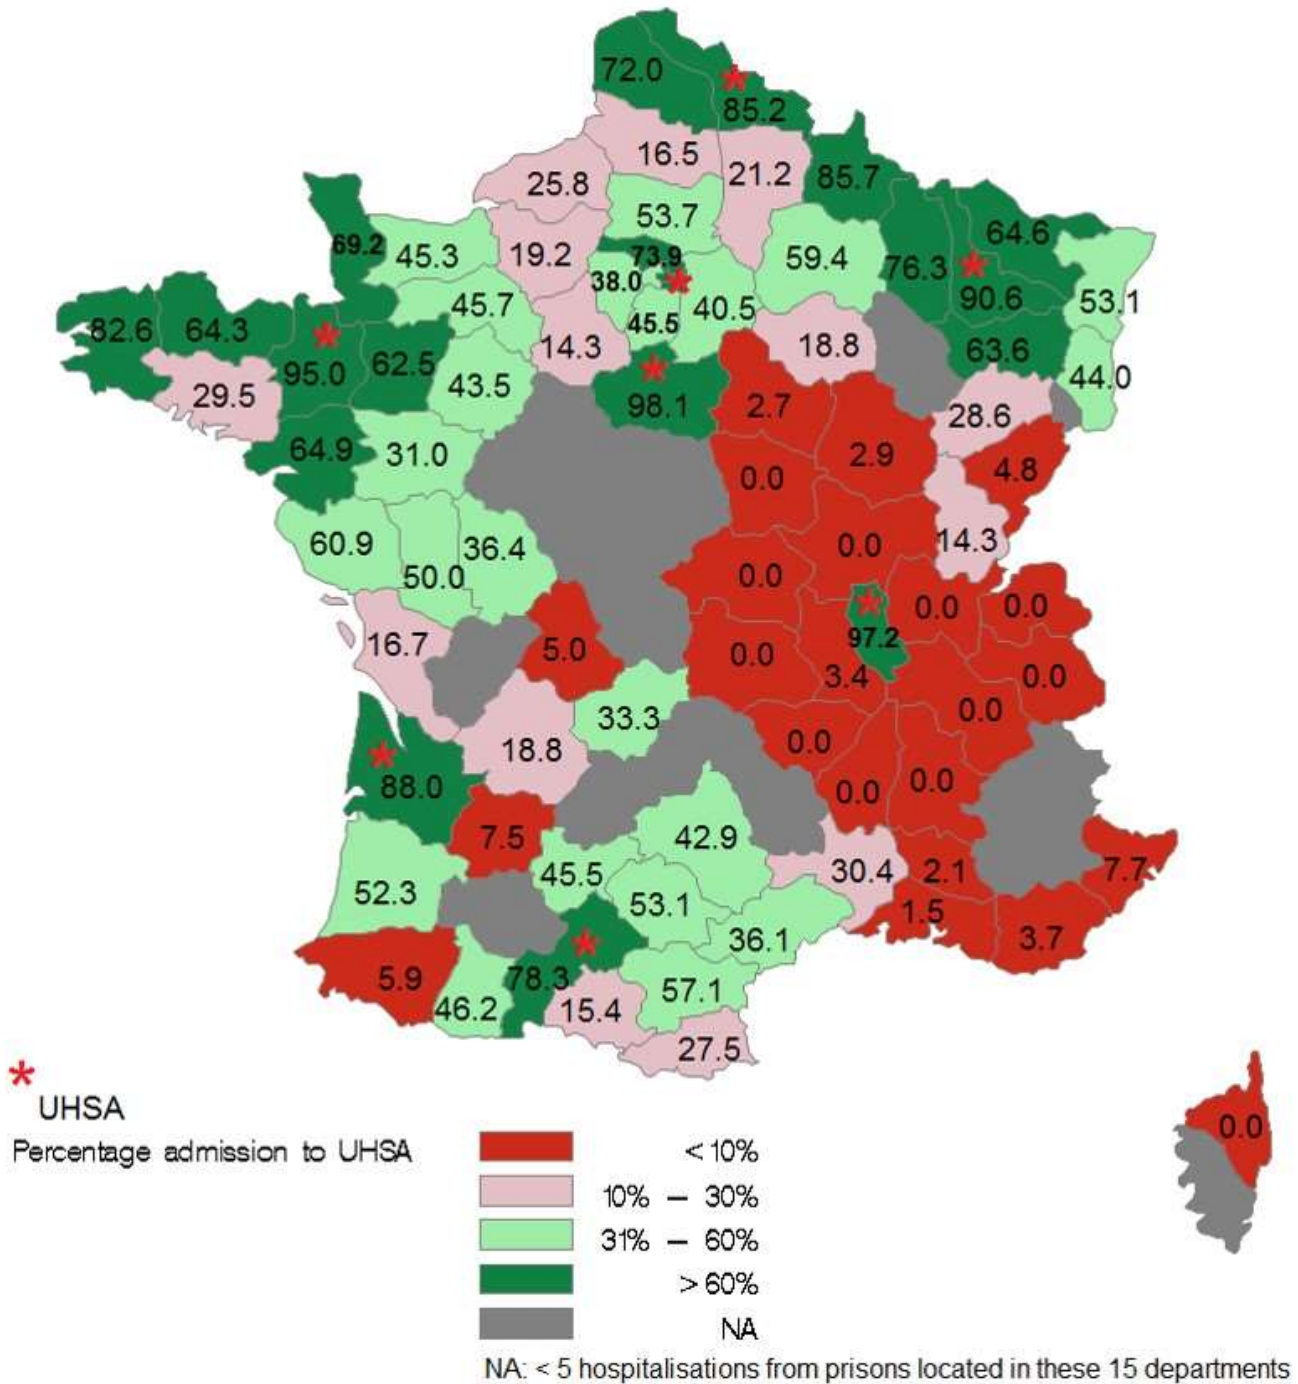

Supplement: appi.ps.201900497.ds001.pdf [file appi.ps.201900497.ds001.pdf]
